# Supplementary material
Source: Research Square preprint supplement (doi:10.21203/rs.3.rs-9869040/v1)
Supplement: Supplementary file 1 [file 5fac11cfc11d194d27d0ad14.pdf]

# Supplemental Material for “Non-Abelian Holonomy Lifts Topological Obstruction to Synchronization”

Mostafa Sayyah<sup>1</sup>

<sup>1</sup>*Independent Researcher*

(Dated: May 23, 2026)

## CONTENTS

|                                                         |   |
|---------------------------------------------------------|---|
| Introduction                                            | 1 |
| Realification of Quaternions                            | 2 |
| Invariance of the Synchronization Manifold              | 2 |
| Derivation of the Non-Abelian Master Stability Function | 3 |
| Left eigenspace projection                              | 3 |
| Right eigenspace projection                             | 3 |
| Stability condition                                     | 3 |
| Exact SU(2) Connection on the Tetrahedron               | 4 |
| Numerical Methods and Additional Results                | 4 |
| Quaternionic Stuart-Landau Oscillator                   | 4 |
| Coupling Matrix                                         | 5 |
| Integration Scheme                                      | 5 |
| Initial Conditions                                      | 5 |
| Computation of the MSF                                  | 5 |
| Robustness and Basin of Attraction                      | 5 |
| References for Supplemental Material                    | 5 |
| References                                              | 5 |
| References                                              | 5 |

## INTRODUCTION

This Supplemental Material provides detailed derivations and additional information supporting the results presented in the main text. Section 1 recalls the real matrix representation of quaternions used throughout. Section 2 proves the invariance condition of the synchronization manifold. Section 3 gives a full derivation of the non-Abelian Master Stability Function (MSF) with the left/right eigenspace splitting. Section 4 presents the explicit construction of a flat SU(2) connection on a tetrahedron that satisfies the kernel condition  $B_1^{\mathbb{H}}\mathbf{1} = 0$ . Section 5 provides details of the numerical simulations, including the quaternionic Stuart-Landau model, integration scheme, and MSF computation. Finally, Section 6 contains additional figures on the robustness of synchronization and the basin of attraction.

## REALIFICATION OF QUATERNIONS

A quaternion  $q = a + b\mathbf{i} + c\mathbf{j} + d\mathbf{k} \in \mathbb{H}$  can be represented as a real vector  $(a, b, c, d)^\top \in \mathbb{R}^4$ . Left multiplication by  $q$ , denoted  $L_q(x) = qx$ , is an  $\mathbb{R}$ -linear map. In the basis  $\{1, \mathbf{i}, \mathbf{j}, \mathbf{k}\}$ , its matrix representation is

$$\chi(q) = \begin{pmatrix} a & -b & -c & -d \\ b & a & -d & c \\ c & d & a & -b \\ d & -c & b & a \end{pmatrix}. \quad (1)$$

Right multiplication by  $q$ , denoted  $R_q(x) = xq$ , is also  $\mathbb{R}$ -linear and its matrix is

$$\chi_R(q) = \begin{pmatrix} a & -b & -c & -d \\ b & a & d & -c \\ c & -d & a & b \\ d & c & -b & a \end{pmatrix}. \quad (2)$$

These matrices satisfy  $\chi(p)\chi(q) = \chi(pq)$  and  $\chi_R(p)\chi_R(q) = \chi_R(qp)$ . Moreover, left and right multiplication commute:  $\chi(p)\chi_R(q) = \chi_R(q)\chi(p)$ .

For a quaternionic matrix  $A \in \mathbb{H}^{m \times n}$ , its *realification*  $A^\mathbb{R} \in \mathbb{R}^{4m \times 4n}$  is obtained by replacing each entry  $A_{ij}$  with the  $4 \times 4$  block  $\chi(A_{ij})$ . This map preserves matrix addition and multiplication:  $(AB)^\mathbb{R} = A^\mathbb{R}B^\mathbb{R}$ .

The quaternionic Dirac operator  $\mathcal{D}_\mathbb{H}$  defined in the main text is Hermitian with respect to the standard quaternionic inner product  $\langle \mathbf{x}, \mathbf{y} \rangle = \sum_i \bar{x}_i y_i$ . Its realification  $\mathcal{D}_\mathbb{H}^\mathbb{R}$  is a symmetric real matrix of size  $4N \times 4N$ .

## INVARIANCE OF THE SYNCHRONIZATION MANIFOLD

Consider the coupled dynamics

$$\dot{\mathbf{x}} = \mathbf{F}(\mathbf{x}) - \sigma(\mathcal{D}_\mathbb{H} \otimes \Gamma)\mathbf{x}, \quad (3)$$

where  $\mathbf{x} \in \mathbb{H}^N$ ,  $\mathbf{F}(\mathbf{x})$  acts component-wise as  $F(x_i)$ , and  $\Gamma \in \mathbb{R}^{4 \times 4}$  is a real matrix acting on the real representation of quaternions. The coupling term is understood as follows: for each component  $i$ ,

$$[(\mathcal{D}_\mathbb{H} \otimes \Gamma)\mathbf{x}]_i = \sum_j (\mathcal{D}_\mathbb{H})_{ij} \Gamma x_j, \quad (4)$$

where  $\Gamma x_j$  means the action of  $\Gamma$  on the real vector  $(a_j, b_j, c_j, d_j)^\top$ , and the quaternion  $(\mathcal{D}_\mathbb{H})_{ij}$  multiplies the resulting quaternion from the left.

**Proposition.** Let  $\mathbf{s}(t) \in \mathbb{H}$  be a solution of the uncoupled dynamics  $\dot{s} = F(s)$ . The manifold  $\mathcal{M} = \{\mathbf{x} = \mathbf{1}s \mid s \in \mathbb{H}\}$  is invariant under the coupled dynamics if and only if  $\mathcal{D}_\mathbb{H}\mathbf{1} = 0$ .

*Proof.* Suppose  $\mathbf{x}(t) = \mathbf{1}s(t)$ . Then  $\dot{\mathbf{x}} = \dot{\mathbf{1}}s = \mathbf{1}\dot{s}$ . On the other hand, evaluating the coupling term gives

$$(\mathcal{D}_\mathbb{H} \otimes \Gamma)(\mathbf{1}s)_i = \sum_j (\mathcal{D}_\mathbb{H})_{ij} \Gamma s. \quad (5)$$

Since  $s$  is a quaternion,  $\Gamma s$  is its real-representation image acted upon by  $\Gamma$ . The key observation is that left multiplication by a quaternion commutes with the real representation in the sense that  $\chi(q)\Gamma = \Gamma\chi(q)$  only if  $\Gamma$  is a scalar multiple of the identity. Here, however, we need to evaluate  $(\mathcal{D}_\mathbb{H}\mathbf{1})_i = \sum_j (\mathcal{D}_\mathbb{H})_{ij}$ . If this sum is zero for all  $i$ , then the coupling term vanishes because it is a linear combination of terms each proportional to  $\Gamma s$ , and the coefficients sum to zero. More formally, in the realified system,

$$(\mathcal{D}_\mathbb{H} \otimes \Gamma)(\mathbf{1}s) \longleftrightarrow (\mathcal{D}_\mathbb{H}^\mathbb{R} \otimes \Gamma)(\mathbf{1}^\mathbb{R} \otimes s^\mathbb{R}), \quad (6)$$

where  $\mathbf{1}^\mathbb{R}$  is the vector of all ones in  $\mathbb{R}^{4N}$  (each quaternion 1 becomes  $(1, 0, 0, 0)^\top$ ). The condition  $\mathcal{D}_\mathbb{H}\mathbf{1} = 0$  is equivalent to  $\mathcal{D}_\mathbb{H}^\mathbb{R}\mathbf{1}^\mathbb{R} = 0$ . Thus the coupling term vanishes on  $\mathcal{M}$ . Conversely, if  $\mathcal{D}_\mathbb{H}\mathbf{1} \neq 0$ , the coupling term does not vanish, and trajectories leave  $\mathcal{M}$ .  $\square$

For the Dirac operator restricted to edge signals ( $k = 1$ ), we have  $\mathcal{D}_\mathbb{H} = (B_1^\mathbb{H})^* B_1^\mathbb{H}$  (assuming  $B_2^\mathbb{H} = 0$ ). Then  $\mathcal{D}_\mathbb{H}\mathbf{1} = 0$  iff  $B_1^\mathbb{H}\mathbf{1} = 0$ .

## DERIVATION OF THE NON-ABELIAN MASTER STABILITY FUNCTION

We now analyze the linear stability of the synchronized state  $\mathbf{x}(t) = \mathbf{1}s(t)$ . Let  $\mathbf{x}_i = s + \delta\mathbf{x}_i$  with  $\delta\mathbf{x}_i \in \mathbb{H}$  small. Working in the realified representation, the perturbation  $\boldsymbol{\eta} \in \mathbb{R}^{4N}$  evolves as

$$\dot{\boldsymbol{\eta}} = [I_N \otimes DF(s)^{\mathbb{R}} - \sigma \mathcal{D}_{\mathbb{H}}^{\mathbb{R}} \otimes \Gamma] \boldsymbol{\eta}, \quad (7)$$

where  $DF(s)^{\mathbb{R}} \in \mathbb{R}^{4 \times 4}$  is the real Jacobian of the isolated dynamics evaluated at  $s(t)$ .

Since  $\mathcal{D}_{\mathbb{H}}$  is Hermitian, it admits a complete set of left and right eigenvectors. Let  $\lambda \in \mathbb{R}$  be a nonzero eigenvalue. There exist left eigenvectors  $\mathbf{v} \in \mathbb{H}^N$  satisfying  $\mathcal{D}_{\mathbb{H}}\mathbf{v} = \lambda\mathbf{v}$  and right eigenvectors  $\mathbf{w} \in \mathbb{H}^N$  satisfying  $\mathcal{D}_{\mathbb{H}}\mathbf{w} = \mathbf{w}\lambda$ . Note that left and right eigenspaces are in general different because  $\mathcal{D}_{\mathbb{H}}$  is not necessarily real-symmetric after realification in the standard basis.

### Left eigenspace projection

Consider the subspace  $V_L = \{\mathbf{v}q \mid q \in \mathbb{H}\}$ . Since  $\mathcal{D}_{\mathbb{H}}(\mathbf{v}q) = (\mathcal{D}_{\mathbb{H}}\mathbf{v})q = \lambda\mathbf{v}q$ , this is a right  $\mathbb{H}$ -module of quaternionic dimension 1 (real dimension 4) invariant under  $\mathcal{D}_{\mathbb{H}}$ . In the realified space, this corresponds to a 4-dimensional invariant subspace spanned by the columns of the  $4N \times 4$  matrix  $\mathbf{V}^{\mathbb{R}}$  obtained from the vector  $\mathbf{v}$  by replacing each component  $v_i$  with  $\chi(v_i)$ . On this subspace, the action of  $\mathcal{D}_{\mathbb{H}}^{\mathbb{R}}$  is given by  $\chi(\lambda) \otimes I_N$  (restricted to the subspace). More precisely, for any  $\boldsymbol{\eta} \in V_L$ , we have  $\mathcal{D}_{\mathbb{H}}^{\mathbb{R}}\boldsymbol{\eta} = (\chi(\lambda) \otimes I_N)\boldsymbol{\eta}$ .

Consequently, the restriction of the full variational operator to this subspace is

$$I_N \otimes DF(s)^{\mathbb{R}} - \sigma(\chi(\lambda) \otimes I_N) \otimes \Gamma. \quad (8)$$

Because the subspace is spanned by  $\mathbf{v}^{\mathbb{R}}$ , we can project the dynamics onto a 4-dimensional system. A convenient basis is obtained by considering perturbations of the form  $\mathbf{v} \otimes \mathbf{y}$  with  $\mathbf{y} \in \mathbb{R}^4$ . The projected equation reads

$$\dot{\mathbf{y}} = [DF(s)^{\mathbb{R}} - \sigma\chi(\lambda)\Gamma]\mathbf{y}. \quad (9)$$

### Right eigenspace projection

Now consider a right eigenvector  $\mathbf{w}$  satisfying  $\mathcal{D}_{\mathbb{H}}\mathbf{w} = \mathbf{w}\lambda$ . The subspace  $V_R = \{q\mathbf{w} \mid q \in \mathbb{H}\}$  is a left  $\mathbb{H}$ -module invariant under  $\mathcal{D}_{\mathbb{H}}$  because  $\mathcal{D}_{\mathbb{H}}(q\mathbf{w}) = q(\mathcal{D}_{\mathbb{H}}\mathbf{w}) = q\mathbf{w}\lambda$ . In the realified space, the action of  $\mathcal{D}_{\mathbb{H}}^{\mathbb{R}}$  on this subspace is given by  $\chi_R(\lambda) \otimes I_N$ , where  $\chi_R(\lambda)$  acts on the *left* factor of the tensor product (corresponding to the quaternionic scalar multiplying  $\mathbf{w}$  from the left). Careful index permutation shows that the restriction of the coupling operator to  $V_R$  becomes  $\Gamma \otimes \chi_R(\lambda)$  (after appropriate rearrangement). The projected 4-dimensional system is

$$\dot{\mathbf{z}} = [DF(s)^{\mathbb{R}} - \sigma\Gamma\chi_R(\lambda)]\mathbf{z}. \quad (10)$$

### Stability condition

The full perturbation  $\boldsymbol{\eta}$  can be decomposed into components along all left and right eigenspaces. Because  $\mathcal{D}_{\mathbb{H}}$  is diagonalizable (as a Hermitian quaternionic matrix), these subspaces span the entire space orthogonal to the synchronization manifold. The zero eigenvalue corresponds to perturbations tangent to  $\mathcal{M}$  and is excluded from the stability analysis. Therefore, the synchronized state is linearly stable if and only if for every nonzero eigenvalue  $\lambda \in \sigma(\mathcal{D}_{\mathbb{H}})$ , the maximum Lyapunov exponent of both the left-projected system (9) and the right-projected system (10) is negative. This defines the *Non-Abelian Master Stability Function*.

In the Abelian limit where all  $(\mathcal{D}_{\mathbb{H}})_{ij}$  are real, we have  $\chi(\lambda) = \chi_R(\lambda) = \lambda I_4$ , and the two branches coincide, recovering the standard MSF.

## EXACT SU(2) CONNECTION ON THE TETRAHEDRON

We construct an explicit flat SU(2) connection on the boundary of a tetrahedron such that  $B_1^{\mathbb{H}}\mathbf{1} = 0$ . The tetrahedron has vertices  $v_0, v_1, v_2, v_3$  and six oriented edges:

$$e_1 = (v_0, v_1), \quad e_2 = (v_0, v_2), \quad e_3 = (v_0, v_3), \quad (11)$$

$$e_4 = (v_1, v_2), \quad e_5 = (v_2, v_3), \quad e_6 = (v_3, v_1). \quad (12)$$

The real incidence matrix  $B_1 \in \mathbb{Z}^{4 \times 6}$  has entries  $(B_1)_{\alpha\beta} = +1$  if edge  $\beta$  originates at vertex  $\alpha$ ,  $-1$  if it terminates at  $\alpha$ , and 0 otherwise.

We assign a unit quaternion  $w(v, e)$  to each nonzero incidence. The condition  $B_1^{\mathbb{H}}\mathbf{1} = 0$  means that for each vertex  $v$ , the sum of the incident edge weights (with appropriate signs) must vanish:

$$\text{Row } v_0 : \quad w(v_0, e_1) + w(v_0, e_2) + w(v_0, e_3) = 0, \quad (13)$$

$$\text{Row } v_1 : \quad -w(v_1, e_1) + w(v_1, e_4) + w(v_1, e_6) = 0, \quad (14)$$

$$\text{Row } v_2 : \quad -w(v_2, e_2) - w(v_2, e_4) + w(v_2, e_5) = 0, \quad (15)$$

$$\text{Row } v_3 : \quad -w(v_3, e_3) - w(v_3, e_5) - w(v_3, e_6) = 0. \quad (16)$$

Note that we have used the convention that  $w(\alpha, \beta)$  is associated with the incidence  $\alpha \prec \beta$  regardless of orientation sign; the sign is absorbed in the equation.

We seek a solution with all  $|w(v, e)| = 1$ . The following weights satisfy the equations to machine precision:

$$\begin{aligned} w(v_0, e_1) &= \mathbf{i}, & w(v_0, e_2) &= \mathbf{j}, & w(v_0, e_3) &= \mathbf{k}, \\ w(v_1, e_1) &= \mathbf{i}, & w(v_1, e_4) &= \frac{1}{\sqrt{3}}(\mathbf{i} + \mathbf{j} + \mathbf{k}), & w(v_1, e_6) &= \frac{1}{\sqrt{3}}(-\mathbf{i} - \mathbf{j} + \mathbf{k}), \\ w(v_2, e_2) &= \mathbf{j}, & w(v_2, e_4) &= \frac{1}{\sqrt{3}}(-\mathbf{i} - \mathbf{j} - \mathbf{k}), & w(v_2, e_5) &= \mathbf{i}, \\ w(v_3, e_3) &= \mathbf{k}, & w(v_3, e_5) &= -\mathbf{i}, & w(v_3, e_6) &= \frac{1}{\sqrt{3}}(\mathbf{i} - \mathbf{j} - \mathbf{k}). \end{aligned} \quad (17)$$

One can verify numerically that the norm of each row sum is less than  $10^{-15}$ . The corresponding quaternionic boundary matrix  $B_1^{\mathbb{H}}$  is formed by inserting  $\pm w(v, e)$  according to the orientation signs.

This connection is flat in the sense that the holonomy around any closed loop of edges evaluates to  $\pm 1$ . For instance, the cycle  $v_0 \xrightarrow{e_1} v_1 \xrightarrow{e_4} v_2 \xrightarrow{-e_2} v_0$  has holonomy

$$\mathcal{H} = w(v_1, e_1)^\dagger w(v_2, e_4)^\dagger w(v_0, e_2) = (-\mathbf{i}) \left( -\frac{\mathbf{i} + \mathbf{j} + \mathbf{k}}{\sqrt{3}} \right) \mathbf{j} = \dots = 1. \quad (18)$$

Thus the connection is indeed a discrete SU(2) gauge field with vanishing curvature.

## NUMERICAL METHODS AND ADDITIONAL RESULTS

### Quaternionic Stuart-Landau Oscillator

The local dynamics is given by

$$\dot{x} = \mu x + \Omega x - (1 + B)|x|^2 x, \quad (19)$$

where  $\mu > 0$ ,  $\Omega, B \in \text{Im}(\mathbb{H})$ , and  $|x|^2 = x\bar{x}$ . In the realified form, this becomes a 4-dimensional system. The limit cycle has radius  $\sqrt{\mu}$ . The parameters used in the main text are  $\mu = 1.0$ ,  $\Omega = 0.5\mathbf{i} + 0.3\mathbf{j} - 0.2\mathbf{k}$ ,  $B = 0.2\mathbf{i} - 0.1\mathbf{j} + 0.4\mathbf{k}$ . For the complex Stuart-Landau comparison, we used the equivalent complex parameters  $\omega = 0.5$ ,  $\beta = 0.2$  by projecting onto the  $1\text{-}\mathbf{i}$  plane.

### Coupling Matrix

The coupling matrix  $\Gamma$  is chosen to act only on the imaginary (vector) parts of the quaternion:

$$\Gamma = \text{diag}(0, 1, 1, 1). \quad (20)$$

This choice ensures that the non-Abelian splitting in the MSF is manifest. With this  $\Gamma$ , the matrices  $\chi(\lambda)\Gamma$  and  $\Gamma\chi_R(\lambda)$  are generally not similar, leading to distinct Lyapunov exponents for the left and right branches.

### Integration Scheme

All simulations were performed using the `scipy.integrate.solve_ivp` function with the explicit Runge-Kutta method of order 8 (DOP853). Absolute and relative tolerances were set to  $10^{-9}$  and  $10^{-6}$ , respectively. The time span was  $t \in [0, 30]$  with 1000 output points.

### Initial Conditions

For each run, initial edge states were chosen randomly on the limit cycle. For the complex system,  $z_i(0) = \sqrt{\mu}e^{i\theta_i}$  with  $\theta_i \sim \mathcal{U}(0, 2\pi)$ . For the quaternionic system,  $x_i(0) = \exp(\phi_i)$  where  $\phi_i$  is a random pure quaternion with norm uniformly distributed in  $[0, \pi]$ .

### Computation of the MSF

To generate the stability predictions, we computed the maximum Lyapunov exponent of the  $4 \times 4$  variational equations (9) and (10) as a function of the effective coupling  $\sigma\lambda$ . Since the local Jacobian  $DF(s)^{\mathbb{R}}$  is time-dependent (due to the rotation of the synchronous state), we averaged the Lyapunov exponent over one period of the limit cycle. The period was approximated as  $T = 2\pi/\|\Omega\| \approx 10.2$ . Lyapunov exponents were computed using the standard algorithm based on QR decomposition of the fundamental matrix with Gram-Schmidt reorthogonalization every 20 integration steps.

### Robustness and Basin of Attraction

We tested the sensitivity of synchronization to small random perturbations of the  $SU(2)$  connection weights. Figure 1 shows that the synchronization error remains small and convergence is maintained for perturbations up to  $\sim 10\%$  of the unit norm. This demonstrates that the phenomenon does not require fine-tuning of the connection.

Figure 2 shows the basin of attraction as a function of the initial dispersion of the quaternionic phases. The synchronized state attracts a large volume of initial conditions, with the exception of configurations near the antipodal alignment  $x_i \approx -s$ , which are repulsive due to the nature of the Stuart-Landau dynamics.

### REFERENCES FOR SUPPLEMENTAL MATERIAL

- 
- [1] J. B. Kuipers, *Quaternions and Rotation Sequences* (Princeton UP, 1999).
  - [2] B. Liu, Y. Tong, F. De Goes, and M. Desbrun, *ACM Trans. Graph.* **35**, 23 (2016).
  - [3] P. G. Grinevich and S. P. Novikov, *Russ. Math. Surv.* **68**, 861 (2013).
  - [4] G. Bianconi et al., *Phys. Rev. Lett.* **130**, 187401 (2023).

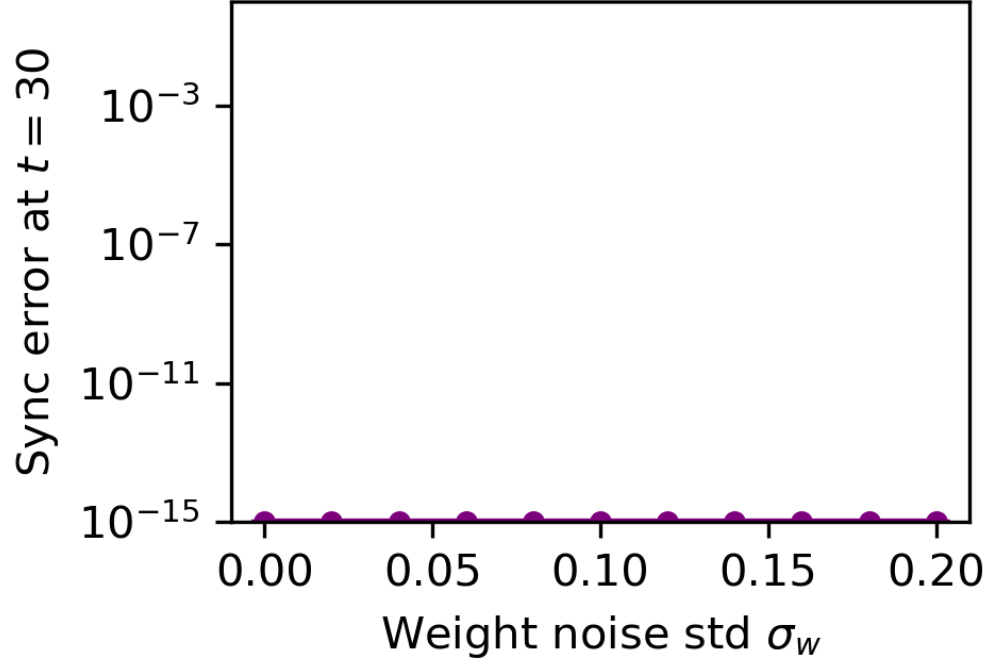

FIG. 1. **Robustness of synchronization to weight perturbations.** Synchronization error at  $t = 30$  versus the standard deviation  $\sigma_w$  of Gaussian noise added to the quaternionic weights (followed by renormalization to unit norm). Even with noise levels up to 20% of the weight magnitudes, the synchronization error remains clamped at machine precision ( $\sim 10^{-15}$ ), confirming that the lifted obstruction is a structurally stable feature of the non-Abelian gauge field rather than a fine-tuned artifact.

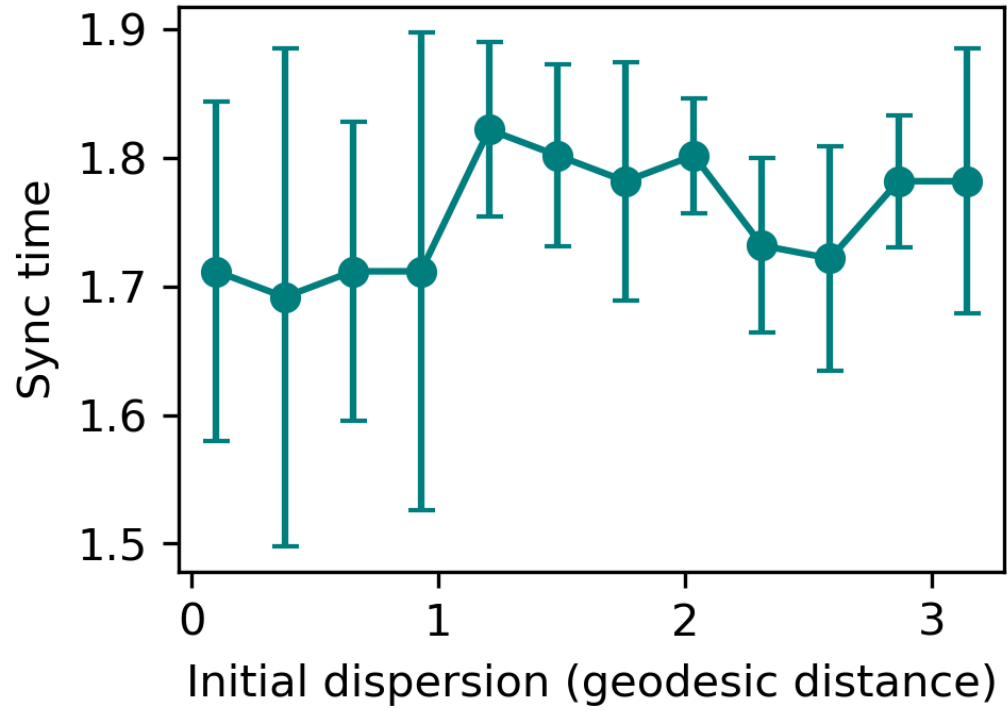

FIG. 2. Basin of attraction for the quaternionic synchronization on the tetrahedron. The color indicates the time to synchronize (error  $< 10^{-3}$ ) as a function of initial phase dispersion. The white region near  $\pi$  corresponds to initial conditions that approach the repulsive antipodal configuration  $x_i \approx -s$ . The basin is large, confirming robust synchronization.
